# Supplementary material for: A novel 2-(aminomethyl)pyridineH2PO4 crystal with second-order nonlinear optical performance
Source: Royal Society of Chemistry journal article supplement (doi:10.1039/d2ce00731b), 2022-01-01
Supplement: d2ce00731b1.pdf [file d2ce00731b1.pdf]

## A novel 2-(Aminomethyl)pyridineH<sub>2</sub>PO<sub>4</sub> crystal with second-order nonlinear optical performance

Duanliang Wang,<sup>a</sup> Defu Sun,<sup>a</sup> Shoubao Zhang,<sup>a</sup> Jiancai Leng,<sup>b</sup> Ruoxian Hou,<sup>a</sup> Hanzhang Chen,<sup>a</sup> Jie Sun,<sup>\*b</sup> Yangyang Dang<sup>\*a</sup> and Chuanying Shen<sup>\*a</sup>

<sup>a</sup> School of Physics and Physical Engineering, Shandong Provincial Key Laboratory of Laser Polarization and Information Technology, Qufu Normal University, Qufu, 273165, P. R. China.

<sup>b</sup> International School for Optoelectronic Engineering, Qilu University of Technology (Shandong Academy of Sciences), Jinan 250353, P. R. China.

Table S1. Atomic coordinates ( $\times 10^4$ ) and equivalent isotropic displacement parameters ( $\text{\AA}^2 \times 10^3$ ) for x11.  $U(\text{eq})$  is defined as one third of the trace of the orthogonalized  $U^{ij}$  tensor.

|      | x       | y        | z       | U(eq) |
|------|---------|----------|---------|-------|
| P(1) | 5420(1) | 8249(1)  | 5892(1) | 27(1) |
| O(4) | 5115(1) | 6509(3)  | 6819(3) | 35(1) |
| O(1) | 6369(1) | 8444(3)  | 6148(3) | 45(1) |
| O(2) | 5048(2) | 10118(3) | 6403(3) | 44(1) |
| N(2) | 9386(1) | 6521(3)  | 5128(3) | 28(1) |
| O(3) | 5286(1) | 7812(3)  | 3964(3) | 42(1) |
| N(1) | 7178(1) | 5437(4)  | 4783(4) | 37(1) |
| C(2) | 7989(2) | 5189(4)  | 4602(3) | 29(1) |
| C(3) | 8308(2) | 3584(5)  | 3813(5) | 38(1) |
| C(1) | 8493(2) | 6809(4)  | 5305(4) | 34(1) |
| C(4) | 7782(2) | 2186(5)  | 3206(4) | 42(1) |
| C(5) | 6951(2) | 2432(5)  | 3398(5) | 45(1) |
| C(6) | 6684(2) | 4059(5)  | 4185(5) | 49(1) |

Table S2. Hydrogen coordinates ( $\times 10^4$ ) and isotropic displacement parameters ( $\text{\AA}^2 \times 10^3$ ) for x11.

|       | x    | y    | z    | U(eq) |
|-------|------|------|------|-------|
| H(1)  | 6602 | 7558 | 5665 | 68    |
| H(2A) | 9511 | 6373 | 4040 | 34    |
| H(2B) | 9536 | 5479 | 5700 | 34    |
| H(2C) | 9650 | 7537 | 5538 | 34    |
| H(3A) | 5209 | 8819 | 3452 | 63    |
| H(3)  | 8872 | 3445 | 3691 | 46    |
| H(1A) | 8341 | 7985 | 4731 | 41    |
| H(1B) | 8363 | 6964 | 6495 | 41    |
| H(4)  | 7988 | 1097 | 2677 | 50    |
| H(5)  | 6582 | 1519 | 3004 | 54    |
| H(6)  | 6122 | 4222 | 4315 | 58    |

Table S3. Bond lengths [Å] and angles [°] for 11.

---

|                |            |                  |          |
|----------------|------------|------------------|----------|
| P(1)-O(4)      | 1.502(2)   | H(2A)-N(2)-H(2B) | 109.5    |
| P(1)-O(1)      | 1.568(2)   | H(2A)-N(2)-H(2C) | 109.5    |
| P(1)-O(2)      | 1.494(2)   | H(2B)-N(2)-H(2C) | 109.5    |
| P(1)-O(3)      | 1.570(2)   | C(1)-N(2)-H(2A)  | 109.5    |
| O(1)-H(1)      | 0.8200     | C(1)-N(2)-H(2B)  | 109.5    |
| N(2)-H(2A)     | 0.8900     | C(1)-N(2)-H(2C)  | 109.5    |
| N(2)-H(2B)     | 0.8900     | P(1)-O(3)-H(3A)  | 109.5    |
| N(2)-H(2C)     | 0.8900     | C(6)-N(1)-C(2)   | 117.6(3) |
| N(2)-C(1)      | 1.478(3)   | N(1)-C(2)-C(3)   | 121.6(3) |
| O(3)-H(3A)     | 0.8200     | N(1)-C(2)-C(1)   | 113.8(3) |
| N(1)-C(2)      | 1.342(3)   | C(3)-C(2)-C(1)   | 124.7(3) |
| N(1)-C(6)      | 1.340(4)   | C(2)-C(3)-H(3)   | 120.2    |
| C(2)-C(3)      | 1.384(4)   | C(2)-C(3)-C(4)   | 119.5(3) |
| C(2)-C(1)      | 1.504(4)   | C(4)-C(3)-H(3)   | 120.2    |
| C(3)-H(3)      | 0.9300     | N(2)-C(1)-C(2)   | 113.7(2) |
| C(3)-C(4)      | 1.385(4)   | N(2)-C(1)-H(1A)  | 108.8    |
| C(1)-H(1A)     | 0.9700     | N(2)-C(1)-H(1B)  | 108.8    |
| C(1)-H(1B)     | 0.9700     | C(2)-C(1)-H(1A)  | 108.8    |
| C(4)-H(4)      | 0.9300     | C(2)-C(1)-H(1B)  | 108.8    |
| C(4)-C(5)      | 1.374(5)   | H(1A)-C(1)-H(1B) | 107.7    |
| C(5)-H(5)      | 0.9300     | C(3)-C(4)-H(4)   | 120.5    |
| C(5)-C(6)      | 1.366(5)   | C(5)-C(4)-C(3)   | 119.0(3) |
| C(6)-H(6)      | 0.9300     | C(5)-C(4)-H(4)   | 120.5    |
| O(4)-P(1)-O(1) | 109.53(13) | C(4)-C(5)-H(5)   | 121.0    |
| O(4)-P(1)-O(3) | 105.70(12) | C(6)-C(5)-C(4)   | 117.9(3) |
| O(1)-P(1)-O(3) | 106.22(13) | C(6)-C(5)-H(5)   | 121.0    |
| O(2)-P(1)-O(4) | 116.03(14) | N(1)-C(6)-C(5)   | 124.4(3) |
| O(2)-P(1)-O(1) | 106.92(13) | N(1)-C(6)-H(6)   | 117.8    |
| O(2)-P(1)-O(3) | 112.04(13) | C(5)-C(6)-H(6)   | 117.8    |
| P(1)-O(1)-H(1) | 109.5      |                  |          |

---
